# Supplementary material for: The Role of bZIP Transcription Factors in Green Plant Evolution: Adaptive Features Emerging from Four Founder Genes
Source: PubMed Central journal article supplement (PMC2492810; doi:10.1371/journal.pone.0002944), 2008-08-13
Supplement: pone.0002944.s023.pdf [file pone.0002944.s023.pdf]

## Accession numbers and classification into groups of homologues of non-sequenced angiosperms.

| Species        | Accession number | Group of homologues | Database version |
|----------------|------------------|---------------------|------------------|
| Brassica napus | DY007004_1       | A                   | v2               |
| Brassica napus | TA14114_3708_1   | A                   | v2               |
| Brassica napus | TA9126_3708_3    | A                   | v2               |
| Brassica napus | TA16660_3708_3   | A                   | v2               |
| Brassica napus | CX191722_1       | A                   | v2               |
| Brassica napus | TA13612_3708_2   | A                   | v2               |
| Brassica napus | CD836876_2       | B                   | v2               |
| Brassica napus | TA12761_3708_2   | C                   | v2               |
| Brassica napus | TA16722_3708_3   | C                   | v2               |
| Brassica napus | CN727131_2       | D                   | v2               |
| Brassica napus | CN732338_1       | D                   | v2               |
| Brassica napus | TA17770_3708_3   | D                   | v2               |
| Brassica napus | CX193835_2       | E                   | v2               |
| Brassica napus | CD825777_3       | F                   | v2               |
| Brassica napus | TA12202_3708_1   | G                   | v2               |
| Brassica napus | BQ704223_2       | G                   | v2               |
| Brassica napus | CD818264_2       | H                   | v2               |
| Brassica napus | TA18042_3708_2   | I                   | v2               |
| Brassica napus | CN737772_1       | I                   | v2               |
| Brassica napus | TA17691_3708_3   | K                   | v2               |
| Brassica napus | CD833815_1       | S                   | v2               |
| Brassica napus | DY022281_3       | S                   | v2               |
| Brassica napus | TA16235_3708_3   | S                   | v2               |
| Brassica napus | TA14505_3708_3   | S                   | v2               |
| Brassica napus | CD841140_1       | S                   | v2               |
| Brassica napus | TA14216_3708_1   | S                   | v2               |
| Brassica napus | CX194685_2       | S                   | v2               |
| Brassica napus | CD818617_3       | S                   | v2               |
| Brassica napus | TA12114_3708_3   | S                   | v2               |
| Brassica napus | CN730710_1       |                     | v2               |
| Glycine max    | BG155969_2       | A                   | v2               |
| Glycine max    | TA67133_3847_1   | A                   | v2               |
| Glycine max    | AW394955_2       | A                   | v2               |
| Glycine max    | TA58793_3847_1   | A                   | v2               |
| Glycine max    | TA62305_3847_3   | A                   | v2               |
| Glycine max    | BE608484_1       | A                   | v2               |
| Glycine max    | TA73904_3847_3   | A                   | v2               |
| Glycine max    | TA68805_3847_3   | A                   | v2               |
| Glycine max    | TA68089_3847_2   | A                   | v2               |
| Glycine max    | TA62306_3847_1   | A                   | v2               |
| Glycine max    | TA68575_3847_2   | A                   | v2               |
| Glycine max    | CO983201_3       | A                   | v2               |
| Glycine max    | TA75637_3847_1   | A                   | v2               |
| Glycine max    | TA50105_3847_3   | C                   | v2               |
| Glycine max    | TA50103_3847_2   | C                   | v2               |
| Glycine max    | TA48766_3847_2   | C                   | v2               |
| Glycine max    | TA51179_3847_3   | C                   | v2               |
| Glycine max    | TA50104_3847_2   | C                   | v2               |
| Glycine max    | TA51180_3847_1   | C                   | v2               |
| Glycine max    | TA51178_3847_1   | C                   | v2               |
| Glycine max    | TA48765_3847_3   | C                   | v2               |
| Glycine max    | Y10685_3         | C                   | v2               |

|                   |                |   |    |
|-------------------|----------------|---|----|
| Glycine max       | TA64252_3847_1 | C | v2 |
| Glycine max       | TA55785_3847_2 | D | v2 |
| Glycine max       | BI498672_2     | D | v2 |
| Glycine max       | AW277406_3     | D | v2 |
| Glycine max       | TA52593_3847_3 | D | v2 |
| Glycine max       | TA48457_3847_3 | D | v2 |
| Glycine max       | TA61630_3847_3 | D | v2 |
| Glycine max       | TA51570_3847_1 | E | v2 |
| Glycine max       | TA51568_3847_3 | E | v2 |
| Glycine max       | TA69507_3847_3 | E | v2 |
| Glycine max       | TA57179_3847_1 | E | v2 |
| Glycine max       | TA50226_3847_3 | F | v2 |
| Glycine max       | BF066744_2     | F | v2 |
| Glycine max       | TA50224_3847_1 | F | v2 |
| Glycine max       | TA47380_3847_1 | G | v2 |
| Glycine max       | BM092367_3     | G | v2 |
| Glycine max       | TA51546_3847_1 | G | v2 |
| Glycine max       | TA51543_3847_1 | G | v2 |
| Glycine max       | TA54417_3847_2 | G | v2 |
| Glycine max       | TA59011_3847_2 | G | v2 |
| Glycine max       | BI316862_2     | G | v2 |
| Glycine max       | TA63034_3847_1 | G | v2 |
| Glycine max       | BF425919_1     | G | v2 |
| Glycine max       | CD487725_2     | H | v2 |
| Glycine max       | TA65796_3847_3 | H | v2 |
| Glycine max       | TA48655_3847_2 | I | v2 |
| Glycine max       | TA66143_3847_2 | I | v2 |
| Glycine max       | TA54356_3847_3 | I | v2 |
| Glycine max       | BE610799_2     | I | v2 |
| Glycine max       | TA60949_3847_2 | I | v2 |
| Glycine max       | CO984129_2     | I | v2 |
| Glycine max       | TA48653_3847_1 | I | v2 |
| Glycine max       | TA56480_3847_1 | I | v2 |
| Glycine max       | TA60948_3847_3 | I | v2 |
| Glycine max       | TA49488_3847_1 | K | v2 |
| Glycine max       | BE346317_2     | S | v2 |
| Glycine max       | TA64646_3847_2 | S | v2 |
| Glycine max       | TA46007_3847_1 | S | v2 |
| Glycine max       | TA68920_3847_3 | S | v2 |
| Glycine max       | TA40538_3847_3 | S | v2 |
| Glycine max       | TA46009_3847_1 | S | v2 |
| Glycine max       | TA48767_3847_2 | S | v2 |
| Glycine max       | TA57778_3847_1 | S | v2 |
| Glycine max       | BE800665_3     | S | v2 |
| Glycine max       | TA46010_3847_1 | S | v2 |
| Glycine max       | TA57777_3847_1 | S | v2 |
| Glycine max       | TA74725_3847_2 | S | v2 |
| Glycine max       | TA57945_3847_2 | S | v2 |
| Glycine max       | TA48379_3847_1 | S | v2 |
| Glycine max       | TA48768_3847_3 | S | v2 |
| Glycine max       | TA57944_3847_2 | S | v2 |
| Glycine max       | TA48380_3847_1 | S | v2 |
| Glycine max       | TA40702_3847_1 | S | v2 |
| Helianthus annuus | TA14603_4232_1 | A | V2 |
| Helianthus annuus | DY925853_1     | A | V2 |
| Helianthus annuus | TA13904_4232_2 | A | V2 |
| Helianthus annuus | TA16636_4232_3 | A | V2 |
| Helianthus annuus | BU018591_2     | C | V2 |

|                     |                |   |    |
|---------------------|----------------|---|----|
| Helianthus annuus   | DY915455_1     | C | V2 |
| Helianthus annuus   | DY921147_1     | C | V2 |
| Helianthus annuus   | BU028485_1     | D | V2 |
| Helianthus annuus   | TA12815_4232_3 | D | V2 |
| Helianthus annuus   | DY915352_2     | D | V2 |
| Helianthus annuus   | CD852649_2     | F | V2 |
| Helianthus annuus   | TA11082_4232_3 | G | V2 |
| Helianthus annuus   | BQ966044_3     | G | V2 |
| Helianthus annuus   | DY916353_3     | G | V2 |
| Helianthus annuus   | TA16001_4232_2 | G | V2 |
| Helianthus annuus   | CD847895_2     | G | V2 |
| Helianthus annuus   | CD848097_2     | H | V2 |
| Helianthus annuus   | BQ970727_2     | I | V2 |
| Helianthus annuus   | DY914999_1     | K | V2 |
| Helianthus annuus   | BQ979657_1     | S | V2 |
| Helianthus annuus   | DY924177_3     | S | V2 |
| Helianthus annuus   | BQ916838_3     | S | V2 |
| Helianthus annuus   | CD848411_1     | S | V2 |
| Helianthus annuus   | TA15647_4232_2 | S | V2 |
| Helianthus annuus   | DY906840_2     | S | V2 |
| Helianthus annuus   | TA7778_4232_2  | S | V2 |
| Helianthus annuus   | TA14115_4232_3 | S | V2 |
| Helianthus annuus   | DY908163_1     | S | V2 |
| Medicago truncatula | CX535343_2     | A | v2 |
| Medicago truncatula | TA35601_3880_3 | A | v2 |
| Medicago truncatula | TA37027_3880_1 | A | v2 |
| Medicago truncatula | TA38803_3880_5 | A | v2 |
| Medicago truncatula | TA29491_3880_6 | A | v2 |
| Medicago truncatula | BI310847_2     | A | v2 |
| Medicago truncatula | TA18597_3880_1 | C | v2 |
| Medicago truncatula | TA24987_3880_1 | C | v2 |
| Medicago truncatula | TA25153_3880_2 | C | v2 |
| Medicago truncatula | TA38704_3880_1 | C | v2 |
| Medicago truncatula | TA21733_3880_2 | D | v2 |
| Medicago truncatula | TA33339_3880_1 | D | v2 |
| Medicago truncatula | TA37406_3880_1 | D | v2 |
| Medicago truncatula | TA32741_3880_3 | D | v2 |
| Medicago truncatula | CX541591_2     | D | v2 |
| Medicago truncatula | TA23383_3880_3 | D | v2 |
| Medicago truncatula | BG582106_2     | D | v2 |
| Medicago truncatula | TA28865_3880_1 | D | v2 |
| Medicago truncatula | TA36738_3880_2 | D | v2 |
| Medicago truncatula | TA31633_3880_3 | D | v2 |
| Medicago truncatula | TA22580_3880_2 | E | v2 |
| Medicago truncatula | TA34097_3880_2 | E | v2 |
| Medicago truncatula | TA25329_3880_2 | F | v2 |
| Medicago truncatula | TA36282_3880_1 | F | v2 |
| Medicago truncatula | BQ148978_2     | G | v2 |
| Medicago truncatula | AL388132_3     | G | v2 |
| Medicago truncatula | TA26173_3880_1 | G | v2 |
| Medicago truncatula | TA33144_3880_2 | G | v2 |
| Medicago truncatula | CX517746_2     | H | v2 |
| Medicago truncatula | AL384098_2     | I | v2 |
| Medicago truncatula | BE203302_2     | I | v2 |
| Medicago truncatula | TA21837_3880_2 | I | v2 |
| Medicago truncatula | TA24461_3880_2 | I | v2 |
| Medicago truncatula | TA22854_3880_1 | K | v2 |
| Medicago truncatula | TA21059_3880_2 | S | v2 |

|                      |                |   |    |
|----------------------|----------------|---|----|
| Medicago truncatula  | TA20293_3880_1 | S | v2 |
| Medicago truncatula  | DY617518_2     | S | v2 |
| Medicago truncatula  | CB893389_1     | S | v2 |
| Medicago truncatula  | DY615615_2     | S | v2 |
| Medicago truncatula  | TA27861_3880_2 | S | v2 |
| Medicago truncatula  | AW981132_2     | S | v2 |
| Medicago truncatula  | TA34745_3880_3 | S | v2 |
| Medicago truncatula  | BE943475_2     | S | v2 |
| Medicago truncatula  | TA20855_3880_2 | S | v2 |
| Solanum lycopersicum | TA24850_4081_1 | A | v2 |
| Solanum lycopersicum | BI204084_2     | A | v2 |
| Solanum lycopersicum | BP891659_2     | A | v2 |
| Solanum lycopersicum | TA29189_4081_1 | A | v2 |
| Solanum lycopersicum | TA29037_4081_2 | A | v2 |
| Solanum lycopersicum | BP903433_2     | A | v2 |
| Solanum lycopersicum | TA23063_4081_3 | C | v2 |
| Solanum lycopersicum | TA31180_4081_1 | C | v2 |
| Solanum lycopersicum | TA20156_4081_3 | C | v2 |
| Solanum lycopersicum | TA26119_4081_3 | D | v2 |
| Solanum lycopersicum | AI488762_2     | D | v2 |
| Solanum lycopersicum | BG126810_2     | D | v2 |
| Solanum lycopersicum | TA32025_4081_3 | D | v2 |
| Solanum lycopersicum | BF097160_2     | D | v2 |
| Solanum lycopersicum | TA27092_4081_3 | D | v2 |
| Solanum lycopersicum | TA22555_4081_1 | D | v2 |
| Solanum lycopersicum | TA22556_4081_1 | D | v2 |
| Solanum lycopersicum | TA22087_4081_1 | D | v2 |
| Solanum lycopersicum | TA27093_4081_3 | D | v2 |
| Solanum lycopersicum | TA23862_4081_2 | E | v2 |
| Solanum lycopersicum | AW651406_2     | E | v2 |
| Solanum lycopersicum | TA31281_4081_1 | E | v2 |
| Solanum lycopersicum | TA27906_4081_3 | F | v2 |
| Solanum lycopersicum | BT013873_2     | G | v2 |
| Solanum lycopersicum | TA23032_4081_1 | G | v2 |
| Solanum lycopersicum | TA22459_4081_1 | G | v2 |
| Solanum lycopersicum | TA17494_4081_1 | I | v2 |
| Solanum lycopersicum | TA28075_4081_3 | I | v2 |
| Solanum lycopersicum | BF098455_3     | I | v2 |
| Solanum lycopersicum | TA25506_4081_1 | I | v2 |
| Solanum lycopersicum | TA20952_4081_2 | K | v2 |
| Solanum lycopersicum | TA20951_4081_2 | K | v2 |
| Solanum lycopersicum | TA28182_4081_2 | S | v2 |
| Solanum lycopersicum | TA18750_4081_3 | S | v2 |
| Solanum lycopersicum | TA29210_4081_2 | S | v2 |
| Solanum lycopersicum | TA32139_4081_2 | S | v2 |
| Solanum lycopersicum | TA27369_4081_2 | S | v2 |
| Solanum lycopersicum | TA18749_4081_1 | S | v2 |
| Solanum lycopersicum | TA23077_4081_1 | S | v2 |
| Solanum lycopersicum | BE450859_3     | S | v2 |
| Solanum tuberosum    | CK862819_1     | A | v2 |
| Solanum tuberosum    | TA27886_4113_6 | A | v2 |
| Solanum tuberosum    | TA31280_4113_2 | A | v2 |
| Solanum tuberosum    | TA37366_4113_1 | A | v2 |
| Solanum tuberosum    | TA39708_4113_1 | A | v2 |
| Solanum tuberosum    | TA44374_4113_2 | A | v2 |
| Solanum tuberosum    | TA45822_4113_3 | A | v2 |
| Solanum tuberosum    | TA47967_4113_1 | A | v2 |
| Solanum tuberosum    | TA39703_4113_3 | B | v2 |

|                   |                |   |    |
|-------------------|----------------|---|----|
| Solanum tuberosum | DR036669_3     | C | v2 |
| Solanum tuberosum | TA24996_4113_1 | C | v2 |
| Solanum tuberosum | TA24997_4113_1 | C | v2 |
| Solanum tuberosum | CK265068_3     | D | v2 |
| Solanum tuberosum | CK266379_1     | D | v2 |
| Solanum tuberosum | CO501957_2     | D | v2 |
| Solanum tuberosum | TA32533_4113_3 | D | v2 |
| Solanum tuberosum | TA39272_4113_2 | D | v2 |
| Solanum tuberosum | TA43569_4113_2 | D | v2 |
| Solanum tuberosum | TA33365_4113_1 | F | v2 |
| Solanum tuberosum | CV468769_2     | G | v2 |
| Solanum tuberosum | TA28515_4113_1 | G | v2 |
| Solanum tuberosum | TA30257_4113_2 | G | v2 |
| Solanum tuberosum | TA35668_4113_1 | G | v2 |
| Solanum tuberosum | TA43344_4113_1 | G | v2 |
| Solanum tuberosum | TA43931_4113_3 | G | v2 |
| Solanum tuberosum | TA44025_4113_2 | G | v2 |
| Solanum tuberosum | TA49072_4113_2 | G | v2 |
| Solanum tuberosum | BG890987_3     | H | v2 |
| Solanum tuberosum | CK275965_1     | I | v2 |
| Solanum tuberosum | TA32440_4113_2 | I | v2 |
| Solanum tuberosum | TA35607_4113_2 | I | v2 |
| Solanum tuberosum | TA37376_4113_2 | I | v2 |
| Solanum tuberosum | TA37377_4113_1 | I | v2 |
| Solanum tuberosum | TA42125_4113_2 | I | v2 |
| Solanum tuberosum | TA26741_4113_3 | K | v2 |
| Solanum tuberosum | CK862038_1     | S | v2 |
| Solanum tuberosum | DN906956_2     | S | v2 |
| Solanum tuberosum | TA23494_4113_2 | S | v2 |
| Solanum tuberosum | TA23510_4113_3 | S | v2 |
| Solanum tuberosum | TA26759_4113_3 | S | v2 |
| Solanum tuberosum | TA27324_4113_3 | S | v2 |
| Solanum tuberosum | TA43690_4113_4 | S | v2 |
| Solanum tuberosum | TA48587_4113_2 | S | v2 |
| Hordeum vulgare   | CV063683_3     | A | v2 |
| Hordeum vulgare   | TA36491_4513_2 | A | v2 |
| Hordeum vulgare   | BU970111_1     | A | v2 |
| Hordeum vulgare   | TA43549_4513_3 | A | v2 |
| Hordeum vulgare   | TA44310_4513_1 | A | v2 |
| Hordeum vulgare   | TA40815_4513_1 | A | v2 |
| Hordeum vulgare   | TA41215_4513_2 | A | v2 |
| Hordeum vulgare   | TA47002_4513_2 | A | v2 |
| Hordeum vulgare   | BF265504_2     | A | v2 |
| Hordeum vulgare   | TA48040_4513_1 | A | v2 |
| Hordeum vulgare   | TA39429_4513_3 | B | v2 |
| Hordeum vulgare   | BF623499_3     | C | v2 |
| Hordeum vulgare   | TA39303_4513_2 | C | v2 |
| Hordeum vulgare   | TA39304_4513_2 | C | v2 |
| Hordeum vulgare   | BF631054_3     | D | v2 |
| Hordeum vulgare   | BQ662138_1     | D | v2 |
| Hordeum vulgare   | TA41819_4513_2 | D | v2 |
| Hordeum vulgare   | TA55610_4513_1 | D | v2 |
| Hordeum vulgare   | TA40164_4513_3 | D | v2 |
| Hordeum vulgare   | TA55989_4513_2 | D | v2 |
| Hordeum vulgare   | TA41242_4513_1 | E | v2 |
| Hordeum vulgare   | BE420598_1     | E | v2 |
| Hordeum vulgare   | TA38477_4513_1 | E | v2 |
| Hordeum vulgare   | TA48408_4513_1 | E | v2 |

|                      |                |   |    |
|----------------------|----------------|---|----|
| Hordeum vulgare      | CV056083_3     | F | v2 |
| Hordeum vulgare      | BE194756_3     | F | v2 |
| Hordeum vulgare      | TA50001_4513_2 | F | v2 |
| Hordeum vulgare      | CA591957_1     | F | v2 |
| Hordeum vulgare      | TA45897_4513_1 | F | v2 |
| Hordeum vulgare      | TA39995_4513_2 | G | v2 |
| Hordeum vulgare      | AV836924_2     | G | v2 |
| Hordeum vulgare      | TA49833_4513_2 | G | v2 |
| Hordeum vulgare      | TA42154_4513_1 | G | v2 |
| Hordeum vulgare      | BE060944_2     | G | v2 |
| Hordeum vulgare      | TA44357_4513_2 | G | v2 |
| Hordeum vulgare      | TA42755_4513_3 | G | v2 |
| Hordeum vulgare      | TA43915_4513_2 | H | v2 |
| Hordeum vulgare      | BM817340_2     | H | v2 |
| Hordeum vulgare      | BF253604_2     | I | v2 |
| Hordeum vulgare      | TA41272_4513_2 | I | v2 |
| Hordeum vulgare      | TA48700_4513_3 | I | v2 |
| Hordeum vulgare      | TA45344_4513_1 | I | v2 |
| Hordeum vulgare      | CV063652_2     | I | v2 |
| Hordeum vulgare      | BG369395_2     | I | v2 |
| Hordeum vulgare      | BQ464812_3     | I | v2 |
| Hordeum vulgare      | TA37782_4513_3 | K | v2 |
| Hordeum vulgare      | BQ766888_2     | S | v2 |
| Hordeum vulgare      | TA31297_4513_2 | S | v2 |
| Hordeum vulgare      | TA40558_4513_3 | S | v2 |
| Hordeum vulgare      | TA53781_4513_1 | S | v2 |
| Hordeum vulgare      | TA34188_4513_3 | S | v2 |
| Hordeum vulgare      | BI958110_1     | S | v2 |
| Hordeum vulgare      | TA31294_4513_2 | S | v2 |
| Hordeum vulgare      | BG415333_3     | S | v2 |
| Hordeum vulgare      | TA35984_4513_1 | S | v2 |
| Hordeum vulgare      | BE558681_2     | S | v2 |
| Hordeum vulgare      | BG343063_2     | S | v2 |
| Hordeum vulgare      | BG415877_3     | S | v2 |
| Hordeum vulgare      | TA56942_4513_4 | S | v2 |
| Saccarum officinarum | CA255858_1     | A | v2 |
| Saccarum officinarum | CA168496_3     | A | v2 |
| Saccarum officinarum | CA189660_2     | A | v2 |
| Saccarum officinarum | CA233918_1     | A | v2 |
| Saccarum officinarum | CA095141_1     | A | v2 |
| Saccarum officinarum | CA109487_1     | A | v2 |
| Saccarum officinarum | CA254950_2     | A | v2 |
| Saccarum officinarum | TA42878_4547_3 | A | v2 |
| Saccarum officinarum | CA291484_3     | A | v2 |
| Saccarum officinarum | CA230985_1     | A | v2 |
| Saccarum officinarum | CA290952_3     | A | v2 |
| Saccarum officinarum | TA34020_4547_3 | A | v2 |
| Saccarum officinarum | TA40347_4547_1 | A | v2 |
| Saccarum officinarum | CA237816_4     | A | v2 |
| Saccarum officinarum | CA075795_5     | A | v2 |
| Saccarum officinarum | CA271379_1     | A | v2 |
| Saccarum officinarum | CA267374_3     | B | v2 |
| Saccarum officinarum | TA33202_4547_1 | B | v2 |
| Saccarum officinarum | TA31887_4547_1 | C | v2 |
| Saccarum officinarum | TA37832_4547_1 | C | v2 |
| Saccarum officinarum | CA228763_1     | C | v2 |
| Saccarum officinarum | CA239922_1     | C | v2 |
| Saccarum officinarum | CA285909_1     | C | v2 |

|                      |                |   |    |
|----------------------|----------------|---|----|
| Saccarum officinarum | CA228758_3     | C | v2 |
| Saccarum officinarum | CA166865_2     | D | v2 |
| Saccarum officinarum | CA276242_1     | D | v2 |
| Saccarum officinarum | TA36471_4547_3 | D | v2 |
| Saccarum officinarum | CA195716_3     | D | v2 |
| Saccarum officinarum | TA42776_4547_3 | D | v2 |
| Saccarum officinarum | TA33240_4547_1 | D | v2 |
| Saccarum officinarum | CA185286_2     | D | v2 |
| Saccarum officinarum | TA39406_4547_2 | D | v2 |
| Saccarum officinarum | CA093242_1     | D | v2 |
| Saccarum officinarum | TA49070_4547_1 | E | v2 |
| Saccarum officinarum | TA47532_4547_2 | E | v2 |
| Saccarum officinarum | CA109161_2     | E | v2 |
| Saccarum officinarum | CA130480_3     | F | v2 |
| Saccarum officinarum | CA139787_1     | F | v2 |
| Saccarum officinarum | CA234095_2     | F | v2 |
| Saccarum officinarum | CA073451_1     | F | v2 |
| Saccarum officinarum | CA150837_2     | G | v2 |
| Saccarum officinarum | TA39660_4547_1 | G | v2 |
| Saccarum officinarum | CA244895_1     | G | v2 |
| Saccarum officinarum | CA291622_2     | G | v2 |
| Saccarum officinarum | TA38482_4547_1 | G | v2 |
| Saccarum officinarum | CA260509_2     | G | v2 |
| Saccarum officinarum | CA298571_3     | G | v2 |
| Saccarum officinarum | TA38701_4547_3 | G | v2 |
| Saccarum officinarum | CA171228_1     | G | v2 |
| Saccarum officinarum | CA079641_2     | G | v2 |
| Saccarum officinarum | CA115460_2     | H | v2 |
| Saccarum officinarum | CA111537_2     | H | v2 |
| Saccarum officinarum | CA251578_1     | I | v2 |
| Saccarum officinarum | CA091164_1     | I | v2 |
| Saccarum officinarum | TA34763_4547_1 | I | v2 |
| Saccarum officinarum | CA299676_3     | I | v2 |
| Saccarum officinarum | CA104938_3     | I | v2 |
| Saccarum officinarum | TA34761_4547_3 | I | v2 |
| Saccarum officinarum | CA152996_3     | I | v2 |
| Saccarum officinarum | CA084077_2     | I | v2 |
| Saccarum officinarum | TA39843_4547_3 | I | v2 |
| Saccarum officinarum | CA281514_3     | I | v2 |
| Saccarum officinarum | TA35957_4547_1 | K | v2 |
| Saccarum officinarum | TA23286_4547_3 | S | v2 |
| Saccarum officinarum | CA253894_1     | S | v2 |
| Saccarum officinarum | CA261153_1     | S | v2 |
| Saccarum officinarum | CA298025_5     | S | v2 |
| Saccarum officinarum | CA285643_2     | S | v2 |
| Saccarum officinarum | TA23279_4547_2 | S | v2 |
| Saccarum officinarum | CA275565_2     | S | v2 |
| Saccarum officinarum | CA066728_3     | S | v2 |
| Saccarum officinarum | CA142570_2     | S | v2 |
| Saccarum officinarum | CA153252_1     | S | v2 |
| Saccarum officinarum | CA158302_1     | S | v2 |
| Saccarum officinarum | CA260549_2     | S | v2 |
| Saccarum officinarum | CA206226_1     | S | v2 |
| Saccarum officinarum | CA285017_4     | S | v2 |
| Saccarum officinarum | CA072374_2     | S | v2 |
| Saccarum officinarum | CA279874_1     | S | v2 |
| Saccarum officinarum | CA130717_1     | S | v2 |
| Saccarum officinarum | TA41955_4547_3 | S | v2 |

|                      |                 |   |    |
|----------------------|-----------------|---|----|
| Saccarum officinarum | TA28783_4547_5  | S | v2 |
| Saccarum officinarum | CA182708_5      | S | v2 |
| Saccarum officinarum | TA24586_4547_1  | S | v2 |
| Saccarum officinarum | CA078759_2      | S | v2 |
| Saccarum officinarum | CA080785_1      | S | v2 |
| Saccarum officinarum | CA253534_2      | S | v2 |
| Sorghum bicolor      | TA37761_4558_1  | A | v2 |
| Sorghum bicolor      | TA38660_4558_2  | A | v2 |
| Sorghum bicolor      | TA26948_4558_1  | A | v2 |
| Sorghum bicolor      | TA36148_4558_1  | B | v2 |
| Sorghum bicolor      | TA32585_4558_2  | B | v2 |
| Sorghum bicolor      | TA31772_4558_2  | C | v2 |
| Sorghum bicolor      | TA27708_4558_3  | C | v2 |
| Sorghum bicolor      | TA26252_4558_1  | C | v2 |
| Sorghum bicolor      | TA23814_4558_1  | C | v2 |
| Sorghum bicolor      | BE361313_1      | D | v2 |
| Sorghum bicolor      | TA39304_4558_1  | D | v2 |
| Sorghum bicolor      | TA22942_4558_1  | D | v2 |
| Sorghum bicolor      | TA29009_4558_3  | D | v2 |
| Sorghum bicolor      | TA32234_4558_1  | D | v2 |
| Sorghum bicolor      | TA26387_4558_1  | D | v2 |
| Sorghum bicolor      | TA22611_4558_3  | D | v2 |
| Sorghum bicolor      | TA24293_4558_1  | E | v2 |
| Sorghum bicolor      | BG947997_3      | E | v2 |
| Sorghum bicolor      | TA30250_4558_2  | E | v2 |
| Sorghum bicolor      | TA23717_4558_3  | F | v2 |
| Sorghum bicolor      | TA28080_4558_2  | G | v2 |
| Sorghum bicolor      | TA31175_4558_1  | G | v2 |
| Sorghum bicolor      | TA27779_4558_3  | G | v2 |
| Sorghum bicolor      | TA33129_4558_1  | G | v2 |
| Sorghum bicolor      | TA29798_4558_1  | G | v2 |
| Sorghum bicolor      | AW565182_1      | G | v2 |
| Sorghum bicolor      | BE361650_3      | H | v2 |
| Sorghum bicolor      | TA28676_4558_3  | H | v2 |
| Sorghum bicolor      | CD463296_2      | H | v2 |
| Sorghum bicolor      | TA31113_4558_1  | K | v2 |
| Sorghum bicolor      | TA23432_4558_2  | K | v2 |
| Sorghum bicolor      | TA23450_4558_2  | S | v2 |
| Sorghum bicolor      | CN140419_1      | S | v2 |
| Sorghum bicolor      | TA22038_4558_1  | S | v2 |
| Sorghum bicolor      | TA21867_4558_1  | S | v2 |
| Sorghum bicolor      | TA23370_4558_1  | S | v2 |
| Triticum aestivum    | DR740223_3      | A | v2 |
| Triticum aestivum    | TA80236_4565_1  | A | v2 |
| Triticum aestivum    | CA625328_3      | A | v2 |
| Triticum aestivum    | TA90746_4565_2  | A | v2 |
| Triticum aestivum    | BE213424_2      | A | v2 |
| Triticum aestivum    | BQ243523_2      | A | v2 |
| Triticum aestivum    | TA104858_4565_1 | A | v2 |
| Triticum aestivum    | TA92266_4565_1  | A | v2 |
| Triticum aestivum    | BQ805403_3      | A | v2 |
| Triticum aestivum    | BE400665_3      | A | v2 |
| Triticum aestivum    | TA90745_4565_1  | A | v2 |
| Triticum aestivum    | TA80237_4565_3  | A | v2 |
| Triticum aestivum    | CK208293_1      | A | v2 |
| Triticum aestivum    | TA110541_4565_3 | A | v2 |
| Triticum aestivum    | CA702598_2      | A | v2 |
| Triticum aestivum    | CA501646_1      | A | v2 |

|                   |                 |   |    |
|-------------------|-----------------|---|----|
| Triticum aestivum | BE516338_3      | A | v2 |
| Triticum aestivum | BJ240248_1      | A | v2 |
| Triticum aestivum | BJ263150_3      | A | v2 |
| Triticum aestivum | TA105268_4565_2 | A | v2 |
| Triticum aestivum | BU100519_3      | A | v2 |
| Triticum aestivum | TA79958_4565_1  | A | v2 |
| Triticum aestivum | CK217886_2      | A | v2 |
| Triticum aestivum | TA77309_4565_1  | B | v2 |
| Triticum aestivum | TA80673_4565_3  | B | v2 |
| Triticum aestivum | TA80671_4565_2  | B | v2 |
| Triticum aestivum | TA77308_4565_3  | B | v2 |
| Triticum aestivum | CJ673564_2      | B | v2 |
| Triticum aestivum | TA77249_4565_3  | C | v2 |
| Triticum aestivum | BM068654_3      | C | v2 |
| Triticum aestivum | TA58949_4565_3  | C | v2 |
| Triticum aestivum | CK213632_1      | C | v2 |
| Triticum aestivum | CA738001_1      | C | v2 |
| Triticum aestivum | TA77247_4565_2  | C | v2 |
| Triticum aestivum | TA95701_4565_1  | C | v2 |
| Triticum aestivum | CA652994_1      | C | v2 |
| Triticum aestivum | TA87219_4565_2  | C | v2 |
| Triticum aestivum | TA87220_4565_3  | C | v2 |
| Triticum aestivum | WHTHBP1BC1_3    | D | v2 |
| Triticum aestivum | DR741523_3      | D | v2 |
| Triticum aestivum | TA104387_4565_3 | D | v2 |
| Triticum aestivum | TA83965_4565_2  | D | v2 |
| Triticum aestivum | CA600392_2      | D | v2 |
| Triticum aestivum | TA61854_4565_3  | D | v2 |
| Triticum aestivum | TA92936_4565_2  | D | v2 |
| Triticum aestivum | TA70566_4565_2  | D | v2 |
| Triticum aestivum | DR739282_2      | D | v2 |
| Triticum aestivum | CF134232_3      | D | v2 |
| Triticum aestivum | TA74666_4565_2  | E | v2 |
| Triticum aestivum | CK163666_3      | E | v2 |
| Triticum aestivum | TA85462_4565_1  | E | v2 |
| Triticum aestivum | TA83436_4565_2  | F | v2 |
| Triticum aestivum | CA678659_1      | F | v2 |
| Triticum aestivum | TA105069_4565_3 | F | v2 |
| Triticum aestivum | BF473537_3      | F | v2 |
| Triticum aestivum | BJ316356_1      | F | v2 |
| Triticum aestivum | BE500054_3      | F | v2 |
| Triticum aestivum | CJ589087_6      | G | v2 |
| Triticum aestivum | CD871271_1      | G | v2 |
| Triticum aestivum | CA485656_3      | G | v2 |
| Triticum aestivum | CK163894_1      | G | v2 |
| Triticum aestivum | CV766489_3      | G | v2 |
| Triticum aestivum | TA70933_4565_3  | G | v2 |
| Triticum aestivum | TA87824_4565_2  | G | v2 |
| Triticum aestivum | CK166015_2      | G | v2 |
| Triticum aestivum | CV768933_3      | H | v2 |
| Triticum aestivum | TA89032_4565_1  | H | v2 |
| Triticum aestivum | CA725309_1      | H | v2 |
| Triticum aestivum | BU101264_3      | I | v2 |
| Triticum aestivum | TA88757_4565_1  | I | v2 |
| Triticum aestivum | TA111061_4565_2 | I | v2 |
| Triticum aestivum | TA79038_4565_1  | I | v2 |
| Triticum aestivum | CD868602_1      | J | v2 |
| Triticum aestivum | TA58175_4565_2  | K | v2 |

|                   |                 |   |    |
|-------------------|-----------------|---|----|
| Triticum aestivum | TA96488_4565_3  | K | v2 |
| Triticum aestivum | CA620381_2      | S | v2 |
| Triticum aestivum | DR736531_2      | S | v2 |
| Triticum aestivum | CA500176_2      | S | v2 |
| Triticum aestivum | CK205817_3      | S | v2 |
| Triticum aestivum | TA78527_4565_2  | S | v2 |
| Triticum aestivum | TA93350_4565_3  | S | v2 |
| Triticum aestivum | TA67477_4565_3  | S | v2 |
| Triticum aestivum | TA55615_4565_1  | S | v2 |
| Triticum aestivum | CD490860_3      | S | v2 |
| Triticum aestivum | BT009178_1      | S | v2 |
| Triticum aestivum | BQ246205_1      | S | v2 |
| Triticum aestivum | TA55715_4565_2  | S | v2 |
| Triticum aestivum | CV776972_1      | S | v2 |
| Triticum aestivum | TA103590_4565_2 | S | v2 |
| Triticum aestivum | TA93351_4565_2  | S | v2 |
| Zea mays          | EE027071_2      | A | v3 |
| Zea mays          | EE022333_3      | A | v3 |
| Zea mays          | TA138324_4577_2 | A | v3 |
| Zea mays          | TA122411_4577_3 | A | v3 |
| Zea mays          | DR959319_1      | A | v3 |
| Zea mays          | TA141798_4577_2 | A | v3 |
| Zea mays          | TA156913_4577_1 | A | v3 |
| Zea mays          | TA126948_4577_2 | A | v3 |
| Zea mays          | TA122668_4577_1 | A | v3 |
| Zea mays          | TA156772_4577_3 | A | v3 |
| Zea mays          | TA139867_4577_1 | A | v3 |
| Zea mays          | TA143482_4577_1 | A | v3 |
| Zea mays          | TA97776_4577_2  | A | v3 |
| Zea mays          | EB484417_1      | A | v3 |
| Zea mays          | TA103855_4577_2 | A | v3 |
| Zea mays          | TA125548_4577_3 | A | v3 |
| Zea mays          | TA124243_4577_1 | A | v3 |
| Zea mays          | TA131302_4577_2 | A | v3 |
| Zea mays          | DR957951_2      | A | v3 |
| Zea mays          | EE169440_2      | A | v3 |
| Zea mays          | TA122667_4577_1 | A | v3 |
| Zea mays          | TA116056_4577_1 | B | v3 |
| Zea mays          | TA145569_4577_1 | B | v3 |
| Zea mays          | DN217793_2      | C | v3 |
| Zea mays          | TA117701_4577_2 | C | v3 |
| Zea mays          | TA130201_4577_1 | C | v3 |
| Zea mays          | BM501254_1      | D | v3 |
| Zea mays          | TA125731_4577_1 | D | v3 |
| Zea mays          | TA112686_4577_3 | D | v3 |
| Zea mays          | TA110586_4577_2 | D | v3 |
| Zea mays          | TA112689_4577_3 | D | v3 |
| Zea mays          | TA133043_4577_1 | D | v3 |
| Zea mays          | DR787705_3      | D | v3 |
| Zea mays          | TA123354_4577_1 | D | v3 |
| Zea mays          | TA139790_4577_2 | D | v3 |
| Zea mays          | CK144343_2      | D | v3 |
| Zea mays          | EE186071_1      | D | v3 |
| Zea mays          | TA112687_4577_2 | D | v3 |
| Zea mays          | TA129179_4577_3 | D | v3 |
| Zea mays          | TA124545_4577_3 | D | v3 |
| Zea mays          | TA110585_4577_1 | D | v3 |
| Zea mays          | TA134232_4577_2 | D | v3 |

|          |                 |   |    |
|----------|-----------------|---|----|
| Zea mays | TA121242_4577_1 | D | v3 |
| Zea mays | TA142240_4577_3 | D | v3 |
| Zea mays | TA133369_4577_3 | E | v3 |
| Zea mays | TA125482_4577_3 | E | v3 |
| Zea mays | TA149780_4577_3 | E | v3 |
| Zea mays | TA129075_4577_3 | E | v3 |
| Zea mays | TA134102_4577_2 | E | v3 |
| Zea mays | TA133368_4577_2 | E | v3 |
| Zea mays | TA134103_4577_1 | E | v3 |
| Zea mays | TA127033_4577_2 | E | v3 |
| Zea mays | TA111059_4577_1 | F | v3 |
| Zea mays | TA129620_4577_1 | F | v3 |
| Zea mays | TA101088_4577_2 | F | v3 |
| Zea mays | TA111061_4577_1 | F | v3 |
| Zea mays | CO451643_2      | F | v3 |
| Zea mays | DR792307_2      | G | v3 |
| Zea mays | TA110413_4577_2 | G | v3 |
| Zea mays | TA119351_4577_1 | G | v3 |
| Zea mays | TA130760_4577_3 | G | v3 |
| Zea mays | CF636457_6      | G | v3 |
| Zea mays | DR823628_3      | G | v3 |
| Zea mays | DR957801_2      | G | v3 |
| Zea mays | TA130761_4577_3 | G | v3 |
| Zea mays | CO442202_2      | G | v3 |
| Zea mays | AY685207_1      | G | v3 |
| Zea mays | TA155899_4577_1 | G | v3 |
| Zea mays | TA119352_4577_3 | G | v3 |
| Zea mays | TA119757_4577_4 | G | v3 |
| Zea mays | CK368868_1      | H | v3 |
| Zea mays | TA124686_4577_1 | H | v3 |
| Zea mays | TA153601_4577_2 | H | v3 |
| Zea mays | TA123976_4577_2 | I | v3 |
| Zea mays | TA118251_4577_1 | I | v3 |
| Zea mays | TA106179_4577_2 | I | v3 |
| Zea mays | TA137622_4577_2 | I | v3 |
| Zea mays | TA150185_4577_2 | I | v3 |
| Zea mays | TA122139_4577_1 | I | v3 |
| Zea mays | TA122138_4577_3 | I | v3 |
| Zea mays | TA117569_4577_3 | I | v3 |
| Zea mays | TA111661_4577_3 | I | v3 |
| Zea mays | TA115056_4577_3 | I | v3 |
| Zea mays | TA141207_4577_3 | I | v3 |
| Zea mays | TA106180_4577_3 | I | v3 |
| Zea mays | TA117567_4577_1 | I | v3 |
| Zea mays | TA134126_4577_2 | I | v3 |
| Zea mays | TA146671_4577_2 | I | v3 |
| Zea mays | TA119583_4577_2 | I | v3 |
| Zea mays | TA115055_4577_3 | I | v3 |
| Zea mays | TA118250_4577_2 | I | v3 |
| Zea mays | TA120717_4577_1 | K | v3 |
| Zea mays | TA124493_4577_5 | S | v3 |
| Zea mays | TA155378_4577_5 | S | v3 |
| Zea mays | TA123144_4577_3 | S | v3 |
| Zea mays | DN218501_3      | S | v3 |
| Zea mays | TA119413_4577_2 | S | v3 |
| Zea mays | TA112581_4577_1 | S | v3 |
| Zea mays | TA100631_4577_1 | S | v3 |
| Zea mays | TA100607_4577_1 | S | v3 |

|          |                 |   |    |
|----------|-----------------|---|----|
| Zea mays | TA123142_4577_6 | S | v3 |
| Zea mays | TA156509_4577_3 | S | v3 |
| Zea mays | DN214099_1      | S | v3 |
