# Supplementary material for: The Role of bZIP Transcription Factors in Green Plant Evolution: Adaptive Features Emerging from Four Founder Genes
Source: PubMed Central journal article supplement (PMC2492810; doi:10.1371/journal.pone.0002944), 2008-08-13
Supplement: pone.0002944.s024.pdf [file pone.0002944.s024.pdf]

### Biological functions of genes in PoGOs.

| Group                                        | PoGO         | Genes                                                   | Function                                                                                                      | Reference                                            |
|----------------------------------------------|--------------|---------------------------------------------------------|---------------------------------------------------------------------------------------------------------------|------------------------------------------------------|
| A                                            | 1            | DPBF4 (EEL), AREB3                                      | Fine regulation of LEA (EEL), ABA responsiveness, drought and high salinity signaling                         | Bensmihen <i>et al.</i> (2005) - J Exp Bot.          |
|                                              |              |                                                         |                                                                                                               | Bensmihen <i>et al.</i> (2002)                       |
|                                              |              |                                                         |                                                                                                               | Uno <i>et al.</i> (2000) - Proc Natl Acad Sci        |
|                                              | 2            | FD, FDP                                                 | Signaling of flowering time                                                                                   | Mathieu <i>et al.</i> (2007) - Curr Biol.            |
|                                              |              |                                                         |                                                                                                               | Abe <i>et al.</i> (2005) - Science.                  |
|                                              |              |                                                         |                                                                                                               | Wellmer <i>et al.</i> (2006) - PLoS Genet.           |
|                                              | 3            | OSE2, GBF4, OSE2-like                                   | Stress and ABA responsiveness, seed development                                                               | Choi <i>et al.</i> (2000) - J Biol Chem.             |
|                                              |              |                                                         |                                                                                                               | Cooper <i>et al.</i> (2003) - Proc Natl Acad Sci     |
|                                              | 4            | ABI5, DPBF2, DPBF1Ha                                    | LEA gene ABA-dependent induction, seed oil biosynthesis, sugar signaling, leaf senescence                     | Nishimura <i>et al.</i> (2007) - Plant J             |
|                                              |              |                                                         |                                                                                                               | Wang <i>et al.</i> (2007) - Planta.                  |
|                                              |              |                                                         |                                                                                                               | Bensmihen <i>et al.</i> (2004) - FEBS Lett.          |
|                                              |              |                                                         |                                                                                                               | Pourtau <i>et al.</i> (2004) - Planta.               |
|                                              |              |                                                         |                                                                                                               | Brocard-Gifford <i>et al.</i> (2003) - Plant Physiol |
|                                              | 5            | TRAB1, ABF1-4, PvZIP6, PHI2, RIP55, ABI5Hv              | ABA responsiveness, plant development, ABA signaling phosphate-dependent, fruit maturation, glucose signaling | Hobo <i>et al.</i> (1999) - Proc Natl Acad Sci       |
|                                              |              |                                                         |                                                                                                               | Davies and Robinson (2000) - Plant Physiol.          |
| Kim <i>et al.</i> (2004) - Plant J.          |              |                                                         |                                                                                                               |                                                      |
| Kang <i>et al.</i> (2002) - Plant Cell.      |              |                                                         |                                                                                                               |                                                      |
| Kagaya <i>et al.</i> (2002) - Plant Cell.    |              |                                                         |                                                                                                               |                                                      |
| Sano and Nagata (2002) - Plant Cell Physiol. |              |                                                         |                                                                                                               |                                                      |
| B                                            | 1            | AtbZIP28 and 17                                         | Endoplasmatic reticulum responses                                                                             | Liu <i>et al.</i> (2007) - Plant J.                  |
| C                                            | 1            | REB, O2, OHP, Bzo2h3, CPRF2Pc, RISBZ1                   | Reserve protein accumulation, regulation of seed expression genes, energetic metabolism                       | Yamamoto <i>et al.</i> (2006) - Plant Physiol.       |
|                                              |              |                                                         |                                                                                                               | Kemper <i>et al.</i> (1999) - Plant Cell.            |
|                                              |              |                                                         |                                                                                                               | Baena-González <i>et al.</i> (2007) - Nature         |
|                                              | 2            | Bzo2h1                                                  | Cell death, basal defense, proline accumulation, seed storage protein gene activation                         | Wellmer <i>et al.</i> (1999) - J Biol Chem           |
|                                              |              |                                                         |                                                                                                               | Weltmeier <i>et al.</i> (2006) - EMBO J.             |
|                                              |              |                                                         |                                                                                                               | Kaminaka <i>et al.</i> (2006) - EMBO J.              |
| 3                                            | RITA, Bzo2h2 | Seed development, senescence, vascular tissue formation | Lara <i>et al.</i> (2003) - J Biol Chem.                                                                      |                                                      |
|                                              |              |                                                         | Silveira <i>et al.</i> (2007) - Plant Sci                                                                     |                                                      |
|                                              | 1            | -                                                       | -                                                                                                             | Izawa <i>et al.</i> (1994) - Plant Cell              |
|                                              | 2            | LG2Zm                                                   | Ligule formation, establishment of the leaf blade-sheath boundary                                             | Harper and Freeling (1996) - Genetics                |

|                                           |                                         |                                                             | stream boundary                                                                                                                                                                                    |                                                         |                                                     |
|-------------------------------------------|-----------------------------------------|-------------------------------------------------------------|----------------------------------------------------------------------------------------------------------------------------------------------------------------------------------------------------|---------------------------------------------------------|-----------------------------------------------------|
| D                                         | 3                                       | TGA3, TGA1, OBF4, STGA1Gm, TGA1.1Pv, MBF2St, PG13Nt, NITFLe | Phosphorus deficiency responsiveness, auxin response, marker of the end of cellular division, salicylic acid response, systemic resistance, jasmonic acid suppression, defense signalling in roots | Walsh <i>et al.</i> (1998) - Genes Dev.                 |                                                     |
|                                           |                                         |                                                             |                                                                                                                                                                                                    | Kesarwani <i>et al.</i> (2007) - Plant Physiol.         |                                                     |
|                                           |                                         |                                                             |                                                                                                                                                                                                    | Zhang <i>et al.</i> (2006) - Plant J.                   |                                                     |
|                                           |                                         |                                                             |                                                                                                                                                                                                    | Johnson <i>et al.</i> (2003) - Plant Cell.              |                                                     |
|                                           |                                         |                                                             |                                                                                                                                                                                                    | Ndamukong <i>et al.</i> (2007) - Plant J.               |                                                     |
|                                           | Foley <i>et al.</i> (2004) - FEBS Lett. |                                                             |                                                                                                                                                                                                    |                                                         |                                                     |
|                                           | 4                                       | Pan                                                         |                                                                                                                                                                                                    | Floral organ number determination                       | Hepworth <i>et al.</i> (2005) - Plant Cell          |
|                                           |                                         |                                                             |                                                                                                                                                                                                    |                                                         | Chuang <i>et al.</i> (1999) - Genes Dev.            |
|                                           | 5                                       | TGA2.1 and 2.2Pv, TGA2,5,6, TGA2.2                          |                                                                                                                                                                                                    | Pathogen, auxin and salicylic acid response             | Thibaud-Nissen <i>et al.</i> (2006) - Plant J. 2006 |
| Kim and Delaney (2002) - Plant J.         |                                         |                                                             |                                                                                                                                                                                                    |                                                         |                                                     |
| Kang and Klessing (2005) - Plant Mol Biol |                                         |                                                             |                                                                                                                                                                                                    |                                                         |                                                     |
| Zhang <i>et al.</i> (2003) - Plant Cell.  |                                         |                                                             |                                                                                                                                                                                                    |                                                         |                                                     |
| E                                         | 1                                       | AtbZIP34 and 61                                             | Plant development                                                                                                                                                                                  | Shen <i>et al.</i> (2007) - Biochem Biophys Res Commun. |                                                     |
| F                                         | 1                                       | -                                                           | -                                                                                                                                                                                                  |                                                         |                                                     |
|                                           | 2                                       | -                                                           | -                                                                                                                                                                                                  |                                                         |                                                     |
| G                                         | 1                                       | CPRF1Pc, ROM2, Osbz8, GBF1Zm, GBF1Bn, TAF2 and 3Nt          | Light responsiveness, maturation and LEA gene repression, ABA regulation, Adh activation, photomorphogenesis                                                                                       | Sehnke <i>et al.</i> (2005) - Cell Res.                 |                                                     |
|                                           |                                         |                                                             |                                                                                                                                                                                                    | Tamai <i>et al.</i> (2002) - Plant Cell Physiol         |                                                     |
|                                           |                                         |                                                             |                                                                                                                                                                                                    | Feldbrugge <i>et al.</i> (1994) - Plant Cell.           |                                                     |
|                                           | 2                                       | ROM1                                                        |                                                                                                                                                                                                    | Maturation gene repression                              | Chern <i>et al.</i> (1996) - Plant Cell. (1)        |
|                                           |                                         |                                                             |                                                                                                                                                                                                    |                                                         | Chern <i>et al.</i> (1996) - Plant Cell. (2)        |
| 3                                         | CPRF4aPc                                |                                                             | Light responsiveness                                                                                                                                                                               | Sprenger-Haussels and Weisshaar (2000) - Plant J        |                                                     |
| 4                                         | EmBP1aZm, HALF1Ta, Embp1Ta              |                                                             | Reserve protein control                                                                                                                                                                            | Kircher <i>et al.</i> (1998) - Mol Gen Genet            |                                                     |
|                                           |                                         |                                                             |                                                                                                                                                                                                    | Okanami <i>et al.</i> (1996) - Genes Cells.             |                                                     |
|                                           |                                         |                                                             |                                                                                                                                                                                                    | Eckardt <i>et al.</i> (1998) - Plant Mol Biol.          |                                                     |
| H                                         | 1                                       | Hy5Like, THY5                                               | Photomorphogenesis, light mediated gene expression                                                                                                                                                 | Hill <i>et al.</i> (1996) - J Biol Chem.                |                                                     |
|                                           | 2                                       | Hy5, THY5Le                                                 | Photomorphogenesis, light mediated gene expression, anthocyanin metabolism                                                                                                                         | Holm <i>et al.</i> (2002) - Genes Dev.                  |                                                     |
|                                           | 1                                       | VIP1, RSGNt, PKSf1                                          | Cell elongation, VirE protein interaction, T-DNA integration, control of gibberellin accumulation                                                                                                  | Vandenbussche <i>et al.</i> (2007) - Plant J.           |                                                     |
|                                           |                                         |                                                             |                                                                                                                                                                                                    | Shin <i>et al.</i> (2007) - Plant J.                    |                                                     |
|                                           |                                         |                                                             |                                                                                                                                                                                                    | Lee <i>et al.</i> (2007) - Plant Cell.                  |                                                     |
|                                           |                                         | RF2a, PosF21                                                | Vascular development, pathogen response                                                                                                                                                            | Jonassen <i>et al.</i> (2007) - Planta                  |                                                     |
|                                           |                                         |                                                             |                                                                                                                                                                                                    | Anand <i>et al.</i> (2007) - Plant Cell.                |                                                     |
|                                           |                                         |                                                             |                                                                                                                                                                                                    | Li <i>et al.</i> (2005) - Proc Natl Acad Sci USA        |                                                     |
|                                           |                                         |                                                             |                                                                                                                                                                                                    | Fukazawa <i>et al.</i> (2000) - Plant Cell              |                                                     |
|                                           |                                         |                                                             |                                                                                                                                                                                                    | Dai <i>et al.</i> (2003) - J Biol Chem                  |                                                     |

|                                         |                                                                                                       |                                                                                                                              |                                                           |                                                                       |
|-----------------------------------------|-------------------------------------------------------------------------------------------------------|------------------------------------------------------------------------------------------------------------------------------|-----------------------------------------------------------|-----------------------------------------------------------------------|
| I                                       | 2                                                                                                     |                                                                                                                              |                                                           | Zhu <i>et al.</i> (2002) - Plant Cell.                                |
|                                         |                                                                                                       |                                                                                                                              |                                                           | Yin <i>et al.</i> (1997) - EMBO J.                                    |
|                                         | 3                                                                                                     | RF2b                                                                                                                         | Pathogen response                                         | Liu <i>et al.</i> (2007) - Biochem J                                  |
|                                         |                                                                                                       |                                                                                                                              |                                                           | Dai <i>et al.</i> (2004) - Proc Natl Acad Sci USA                     |
|                                         | 4                                                                                                     | VSF1Le                                                                                                                       | Control of xylem gene expression                          | Torres-Schumann <i>et al.</i> (1996) - Plant J                        |
|                                         |                                                                                                       |                                                                                                                              | Ringli and Keller (1998) - Plant Mol Biol.                |                                                                       |
| PoGPI1                                  | UNE4                                                                                                  | Female gametophyte development                                                                                               | Pagnussat <i>et al.</i> (2005) - Development              |                                                                       |
| J                                       | 1                                                                                                     | -                                                                                                                            | -                                                         |                                                                       |
| K                                       | 1                                                                                                     | AtbZIP60                                                                                                                     | ER stress                                                 | Iwata <i>et al.</i> (2005) - Proc Natl Acad Sci                       |
| L                                       | 1                                                                                                     | -                                                                                                                            | -                                                         |                                                                       |
|                                         | 2                                                                                                     | -                                                                                                                            | -                                                         |                                                                       |
| S                                       | S1                                                                                                    | AAK01953Pa, AAK25822Pv                                                                                                       | Water deficit response                                    | Rodriguez-Uribe and O'Connell (2006) - Journal of Experimental Botany |
|                                         | SE1                                                                                                   | -                                                                                                                            | -                                                         |                                                                       |
|                                         | SM1                                                                                                   | -                                                                                                                            | -                                                         |                                                                       |
|                                         | SE2                                                                                                   | PPI1Cc,BZI-2Nt, CPRF7Pc, ATB2, GBF5                                                                                          | Light response, hypoosmolarity response, pathogen defence | Satoh <i>et al.</i> (2004) - Plant Cell Physiology                    |
|                                         |                                                                                                       |                                                                                                                              |                                                           | Wiese <i>et al.</i> (2005) - Biochemical Society Transactions         |
|                                         |                                                                                                       |                                                                                                                              |                                                           | Rook <i>et al.</i> (1998) - The Plant Journal                         |
|                                         |                                                                                                       |                                                                                                                              |                                                           | Rook <i>et al.</i> (1998) - Plant Molecular Biology                   |
|                                         |                                                                                                       |                                                                                                                              |                                                           | Strathmann <i>et al.</i> (2001) - The Plant Journal                   |
|                                         |                                                                                                       |                                                                                                                              |                                                           | Rügner <i>et al.</i> (2001) - Mol Genet Genomics                      |
|                                         | Lee <i>et al.</i> (2002) - Mol Plant Microbe Interact                                                 |                                                                                                                              |                                                           |                                                                       |
|                                         | SM2                                                                                                   | mLIP15, OBF1Zm, OsbZIP86, OsbZIP87                                                                                           | Cold response and signaling                               | Singh <i>et al.</i> (1990) - The Plant Cell                           |
|                                         |                                                                                                       |                                                                                                                              |                                                           | Shimizu <i>et al.</i> (2005) - Plant Cell Physiol                     |
|                                         |                                                                                                       |                                                                                                                              |                                                           | Aguan <i>et al.</i> (1993) - Mol Gen Genet.                           |
|                                         |                                                                                                       |                                                                                                                              | Kusano <i>et al.</i> (1995) - Mol Gen Genet.              |                                                                       |
| SE3                                     | TBZFNt, BZI-3Nt, AAD55394Le, TBZ17, CAA74022, CAA774023, CpZIP1, CpZIP2, ABZ1, BZI-4, CPRF6, AtbZIP53 | Hypoosmolarity response, light response, senescence, histone regulation, drought response, ABA signaling, anaerobic response | Satoh <i>et al.</i> (2004) - Plant Cell Physiology        |                                                                       |
|                                         |                                                                                                       |                                                                                                                              | Weltmeier <i>et al.</i> (2006) - The EMBO Journal         |                                                                       |
|                                         |                                                                                                       |                                                                                                                              | Rügner <i>et al.</i> (2001) - Mol Genet Genomics          |                                                                       |
|                                         |                                                                                                       |                                                                                                                              | Yang <i>et al.</i> (2001) - Plant Physiology              |                                                                       |
|                                         |                                                                                                       |                                                                                                                              | Martinez-Garcia <i>et al.</i> (1998) - The Plant Journal  |                                                                       |
|                                         |                                                                                                       |                                                                                                                              | Ditzer and Bartels (2006) - Plant Mol Biol                |                                                                       |
|                                         |                                                                                                       |                                                                                                                              | Sell and Hehl (2004) - Eur. J. Biochem.                   |                                                                       |
| Stankovic <i>et al.</i> (2000) - Planta |                                                                                                       |                                                                                                                              |                                                           |                                                                       |
