# Supplementary material for: The Role of bZIP Transcription Factors in Green Plant Evolution: Adaptive Features Emerging from Four Founder Genes
Source: PubMed Central journal article supplement (PMC2492810; doi:10.1371/journal.pone.0002944), 2008-08-13
Supplement: pone.0002944.s030.pdf [file pone.0002944.s030.pdf]

| XS24 | XS48 | NRA   | NRB  | NSL | NSR   | NST  | NYL  | NYR  | PLA |
|------|------|-------|------|-----|-------|------|------|------|-----|
| 7    | 3    | 15    | 0    | 0   | 14    | 0    | 0    | 0    | 0   |
| 0    | 0    | 1     | 0    | 0   | 0     | 9    | 0    | 8    | 0   |
| 18   | 42   | 191   | 335  | 74  | 174   | 28   | 27   | 31   | 36  |
| 0    | 0    | 0     | 0    | 20  | 0     | 0    | 17   | 0    | 0   |
| 16   | 9    | 3     | 25   | 19  | 9     | 0    | 2    | 42   | 0   |
| 0    | 0    | 1     | 0    | 0   | 0     | 7    | 0    | 0    | 0   |
| 0    | 0    | 0     | 0    | 0   | 0     | 0    | 0    | 0    | 0   |
| 36   | 16   | 24    | 0    | 168 | 13    | 0    | 104  | 0    | 0   |
| 0    | 0    | 0     | 0    | 1   | 0     | 0    | 3    | 16   | 0   |
| 79   | 83   | 105   | 122  | 126 | 78    | 81   | 15   | 59   | 47  |
| 0    | 9    | 4     | 0    | 0   | 3     | 22   | 0    | 0    | 5   |
| 12   | 11   | 20    | 57   | 26  | 11    | 35   | 34   | 5    | 9   |
| 12   | 93   | 54    | 0    | 181 | 24    | 70   | 54   | 0    | 379 |
| 2    | 0    | 6     | 0    | 0   | 3     | 0    | 0    | 0    | 4   |
| 0    | 0    | 4     | 49   | 27  | 0     | 54   | 9    | 0    | 0   |
| 5    | 2    | 0     | 6    | 11  | 11    | 20   | 26   | 0    | 0   |
| 0    | 0    | 0     | 42   | 12  | 18    | 0    | 0    | 0    | 0   |
| 15   | 105  | 330   | 312  | 209 | 325   | 34   | 111  | 210  | 4   |
| 26   | 6    | 246   | 44   | 19  | 216   | 48   | 24   | 376  | 0   |
| 0    | 2    | 2     | 31   | 0   | 1     | 0    | 57   | 0    | 0   |
| 0    | 0    | 8     | 85   | 0   | 0     | 42   | 0    | 0    | 0   |
| 0    | 0    | 0     | 0    | 0   | 0     | 0    | 0    | 6    | 0   |
| 33   | 0    | 88    | 67   | 17  | 12    | 0    | 5    | 102  | 0   |
| 0    | 0    | 24    | 82   | 0   | 0     | 0    | 0    | 18   | 0   |
| 17   | 0    | 129   | 200  | 0   | 175   | 0    | 0    | 24   | 0   |
| 0    | 0    | 22    | 7    | 1   | 130   | 0    | 0    | 28   | 0   |
| 0    | 0    | 135   | 288  | 1   | 295   | 0    | 0    | 193  | 2   |
| 6    | 0    | 147   | 126  | 0   | 551   | 62   | 0    | 201  | 0   |
| 3    | 57   | 1079  | 136  | 86  | 782   | 76   | 35   | 888  | 25  |
| 35   | 29   | 10    | 8    | 106 | 0     | 0    | 30   | 8    | 78  |
| 0    | 8    | 0     | 30   | 57  | 0     | 0    | 26   | 0    | 0   |
| 26   | 9    | 45    | 73   | 69  | 73    | 11   | 74   | 142  | 0   |
| 159  | 287  | 494   | 168  | 130 | 116   | 20   | 249  | 446  | 45  |
| 0    | 0    | 0     | 0    | 3   | 12    | 56   | 0    | 0    | 4   |
| 0    | 0    | 23    | 0    | 0   | 18    | 175  | 0    | 28   | 0   |
| 0    | 0    | 0     | 0    | 0   | 0     | 25   | 0    | 0    | 0   |
| 0    | 0    | 2     | 0    | 3   | 0     | 0    | 0    | 0    | 0   |
| 0    | 0    | 4     | 0    | 0   | 0     | 19   | 0    | 0    | 0   |
| 52   | 14   | 29    | 7    | 49  | 7     | 28   | 59   | 0    | 7   |
| 42   | 67   | 87    | 248  | 186 | 52    | 16   | 112  | 33   | 58  |
| 28   | 5    | 0     | 5    | 20  | 2     | 23   | 23   | 0    | 0   |
| 2    | 0    | 0     | 0    | 0   | 0     | 0    | 0    | 0    | 0   |
| 2    | 0    | 0     | 4    | 9   | 28    | 0    | 1    | 0    | 2   |
| 51   | 65   | 0     | 139  | 68  | 91    | 78   | 41   | 154  | 32  |
| 2    | 0    | 0     | 0    | 0   | 0     | 2    | 0    | 0    | 0   |
| 10   | 104  | 8     | 0    | 16  | 0     | 60   | 40   | 0    | 22  |
| 0    | 0    | 32    | 5    | 0   | 26    | 38   | 0    | 6    | 0   |
| 0    | 0    | 13    | 0    | 0   | 0     | 0    | 0    | 30   | 0   |
| 0    | 0    | 0     | 0    | 0   | 0     | 0    | 0    | 2    | 0   |
| 0    | 0    | 0     | 0    | 0   | 0     | 0    | 0    | 0    | 0   |
| 78   | 71   | 45    | 56   | 138 | 55    | 26   | 92   | 79   | 18  |
| 0    | 0    | 0     | 0    | 0   | 0     | 0    | 0    | 0    | 0   |
| 0    | 0    | 0     | 0    | 0   | 0     | 0    | 0    | 0    | 0   |
| 0    | 0    | 0     | 0    | 0   | 0     | 0    | 0    | 0    | 0   |
| 162  | 88   | 60    | 70   | 55  | 38    | 0    | 63   | 100  | 42  |
| 26   | 8    | 3     | 17   | 40  | 7     | 31   | 57   | 0    | 27  |
| 29   | 0    | 0     | 0    | 0   | 2     | 0    | 0    | 0    | 0   |
| 0    | 125  | 15    | 31   | 96  | 19    | 0    | 197  | 14   | 0   |
| 97   | 159  | 573   | 29   | 137 | 121   | 18   | 381  | 156  | 72  |
| 0    | 0    | 0     | 0    | 0   | 0     | 0    | 0    | 0    | 0   |
| 0    | 0    | 11    | 0    | 0   | 2     | 0    | 0    | 3    | 0   |
| 0    | 0    | 16    | 0    | 0   | 0     | 0    | 0    | 8    | 0   |
| 1163 | 2229 | 11725 | 8603 | 727 | 14243 | 4591 | 1437 | 8813 | 195 |
| 0    | 0    | 0     | 0    | 0   | 0     | 0    | 0    | 0    | 0   |
| 2    | 43   | 39    | 42   | 10  | 123   | 1    | 25   | 80   | 27  |
| 0    | 0    | 0     | 0    | 1   | 9     | 0    | 0    | 0    | 0   |
| 29   | 14   | 10    | 0    | 4   | 0     | 0    | 5    | 0    | 0   |
| 0    | 0    | 16    | 0    | 0   | 0     | 0    | 0    | 8    | 0   |
| 537  | 628  | 1214  | 336  | 298 | 329   | 283  | 217  | 191  | 132 |
| 0    | 0    | 2     | 0    | 0   | 0     | 0    | 0    | 0    | 0   |
