# Supplementary material for: The Role of bZIP Transcription Factors in Green Plant Evolution: Adaptive Features Emerging from Four Founder Genes
Source: PLoS One. 2008 Aug 13;3(8):e2944. doi: 10.1371/journal.pone.0002944 (PMC2492810; doi:10.1371/journal.pone.0002944)
Supplement: Table S6 — Organism abbreviations. (0.03 MB XLS) [file pone.0002944.s026.xls]

## Sheet: Sheet1
Organism abbreviations.
Organism	Abbreviation
Antirrhinum majus	Am
Brassica napus	Bn
Capsicum annuum	Ca
Capsicum chinense	Cc
Catharanthus roseus	Cr
Craterostigma plantagineum	Cp
Glycine max	Gm
Helianthus annus	Ha
Medicago truncatula	Mt
Nicotiana tabacum	Nt
Paulownia kawakamii	Pk
Petroselinum crispum	Pc
Phaseolus acutifolius	Pa
Phaseolus vulgaris	Pv
Raphanus sativus	Rs
Sinapis alba	Sa
Solanun lycopersicum	Sl
Solanun tuberosum	St
Spinacia oleracea	So
Vicia faba	Vf
Vitis vinifera	Vv
Coix lacryma-jobi	Jo
Hordeum vulgare	Hv
Saccharum ssp.	Ss
Sorghum bicolor	Sb
Triticum aestivum	Ta
Zea mays	Zm
